# Supplementary material for: Exploring Urban Lighting Design Effect on Citizens’ Emotions through the Application of Kansei <span aria-describedby="tippy-44">Methodology
Source: Preprints.org preprint supplement (doi:10.20944/preprints202405.1129.v1), 2024-05-17
Supplement: Supplementary file 1 [file supplementary]

|                               |    | Variable 1                                                                          | Variable 2  | PERÚ                        | SPAIN<br>Variable 3         | GERMANY                           |
|-------------------------------|----|-------------------------------------------------------------------------------------|-------------|-----------------------------|-----------------------------|-----------------------------------|
| luminous space 1 + variations | 1a |    | II penumbra |                             |                             |                                   |
|                               | 1b |    | III bright  | 28,68%<br><b>trust</b>      | 25,44%<br><b>trust</b>      | 19,17%<br><b>exciting</b>         |
|                               | 1c |    | I opaque    |                             |                             | 19,17%<br><b>I do not like</b>    |
| luminous space 2 + variations | 2a |    | III bright  | 31,78%<br><b>I like it</b>  | 25,44%<br><b>I like it</b>  | 25,83%<br><b>feel comfortable</b> |
|                               | 2b |   | II penumbra |                             |                             |                                   |
|                               | 2c |  | I opaque    |                             |                             |                                   |
| luminous space 3 + variations | 3a |  | II penumbra |                             |                             |                                   |
|                               | 3b |  | I opaque    |                             |                             |                                   |
|                               | 3c |  | III bright  | 28,68%<br><b>attractive</b> | 21,05%<br><b>attractive</b> | 27,50%<br><b>enthusiasm</b>       |
| luminous space 4 + variations | 4a |  | III bright  | 29,46%<br><b>liking</b>     | 27,19%<br><b>liking</b>     | 22,50%<br><b>liking</b>           |
|                               | 4b |  | I opaque    |                             |                             |                                   |
|                               | 4c |  | II penumbra |                             |                             |                                   |
| luminous space 5 + variations | 5a |  | II penumbra |                             |                             |                                   |
|                               | 5b |  | III bright  | 28,68%<br><b>vitality</b>   | 28,95%<br><b>happiness</b>  | 30,83%<br><b>attractive</b>       |
|                               | 5c |  | I opaque    |                             |                             |                                   |



|                                |                                                                                        |                                                                                     |               | PERÚ                                               | SPAIN                                                | GERMANY                                       |
|--------------------------------|----------------------------------------------------------------------------------------|-------------------------------------------------------------------------------------|---------------|----------------------------------------------------|------------------------------------------------------|-----------------------------------------------|
| Variable 1                     |                                                                                        | Variable 2                                                                          |               | Variable 3                                         |                                                      |                                               |
| luminous space 6 + variations  | 6a                                                                                     |    | I    opaque   |                                                    |                                                      |                                               |
|                                | 6b                                                                                     |    | II   penumbra |                                                    |                                                      |                                               |
|                                | 6c                                                                                     |    | III    bright | 21,71% <b>trust</b>                                | 23,68% <b>attractive</b>                             | 18,33% <b>cozy</b><br>18,33% <b>security</b>  |
|                                | Fuente: : © ERCO GmbH, www.erco.com. Photography: Tomas Södergren, Stockholm           |                                                                                     |               |                                                    |                                                      |                                               |
| luminous space 7 + variations  | 7a                                                                                     |    | I    opaque   |                                                    |                                                      |                                               |
|                                | 7b                                                                                     |   | III    bright | 30,23% <b>vitality</b>                             | 31,58% <b>vitality</b>                               | 24,17% <b>I do not like</b>                   |
|                                | 7c                                                                                     |  | II   penumbra |                                                    |                                                      |                                               |
|                                | Fuente: © ERCO GmbH, www.erco.com. Photography: Dirk Vogel                             |                                                                                     |               |                                                    |                                                      |                                               |
| luminous space 8 + variations  | 8a                                                                                     |  | I    opaque   |                                                    |                                                      |                                               |
|                                | 8b                                                                                     |  | II   penumbra |                                                    |                                                      |                                               |
|                                | 8c                                                                                     |  | III    bright | 21,71% <b>I like it</b>                            | 21,05% <b>I like it</b><br>21,05% <b>interesting</b> | 15% <b>attractive</b><br>15% <b>socialize</b> |
|                                | Fuente: ZUMTOBEL group, www.zumtobel.com. Photography: xxx                             |                                                                                     |               |                                                    |                                                      |                                               |
| luminous space 9 + variations  | 9a                                                                                     |  | III    bright | 30,23% <b>enthusiasm</b><br>30,23% <b>vitality</b> | 28,07% <b>vitality</b>                               | 24,17% <b>attractive</b>                      |
|                                | 9b                                                                                     |  | I    opaque   |                                                    |                                                      |                                               |
|                                | 9c                                                                                     |  | II   penumbra |                                                    |                                                      |                                               |
|                                | Fuente: © ERCO GmbH, www.erco.com. Photography: Frieder Blickle, Hamburg               |                                                                                     |               |                                                    |                                                      |                                               |
| luminous space 10 + variations | 10a                                                                                    |  | I    opaque   |                                                    |                                                      |                                               |
|                                | 10b                                                                                    |  | III    bright | 22,44% <b>I like it</b>                            | 19,30% <b>I like it</b>                              | 30,00% <b>feel comfortable</b>                |
|                                | 10c                                                                                    |  | II   penumbra |                                                    |                                                      |                                               |
|                                | Fuente: © ERCO GmbH, www.erco.com. Photography: Frieder Blickle, Hamburg / Deutschland |                                                                                     |               |                                                    |                                                      |                                               |



|                                |                                                                                                                       | Variable 1                                                                          | Variable 2   | Variable 3                |                           |                                                 |
|--------------------------------|-----------------------------------------------------------------------------------------------------------------------|-------------------------------------------------------------------------------------|--------------|---------------------------|---------------------------|-------------------------------------------------|
|                                |                                                                                                                       |                                                                                     |              | PERÚ                      | SPAIN                     | GERMANY                                         |
| luminous space 11 + variations | 11a                                                                                                                   |    | II penumbra  |                           |                           |                                                 |
|                                | 11b                                                                                                                   |    | I opaque     |                           |                           |                                                 |
|                                | 11c                                                                                                                   |    | III bright   | 24,81% <b>liking</b>      | 21,05% <b>interesting</b> | 25,83% <b>attractive</b>                        |
|                                | Fuente: © ERCO GmbH, www.erco.com. Photography: Frieder Blickle, Hamburg / Deutschland                                |                                                                                     |              |                           |                           |                                                 |
| luminous space 12 + variations | 12a                                                                                                                   |    | I opaque     |                           |                           |                                                 |
|                                | 12b                                                                                                                   |   | III bright   | 30,23% <b>enthusiasm</b>  | 27,19% <b>enthusiasm</b>  | 30,83% <b>enthusiasm</b>                        |
|                                | 12c                                                                                                                   |  | II penumbra  |                           |                           |                                                 |
|                                | Fuente: © ERCO GmbH, www.erco.com. Photography: Moritz Hillebrand, Zürich/Schweiz, Timm Lange, Düsseldorf/Deutschland |                                                                                     |              |                           |                           |                                                 |
| luminous space 13 + variations | 13a                                                                                                                   |  | III bright   | 24,81% <b>interesting</b> | 27,19% <b>interesting</b> | 31,67% <b>I like it</b>                         |
|                                | 13b                                                                                                                   |  | I opaque     |                           |                           |                                                 |
|                                | 13c                                                                                                                   |  | III penumbra |                           |                           |                                                 |
|                                | Fuente: © ERCO GmbH, www.erco.com. Photography: Thomas Mayer, Neuss                                                   |                                                                                     |              |                           |                           |                                                 |
| luminous space 14 + variations | 14a                                                                                                                   |  | III bright   | 20,93% <b>vitality</b>    | 26,32% <b>vitality</b>    | 23,33% <b>I like it</b>                         |
|                                | 14b                                                                                                                   |  | II penumbra  |                           |                           |                                                 |
|                                | 14c                                                                                                                   |  | I opaque     |                           |                           |                                                 |
|                                | Fuente: © ERCO GmbH, www.erco.com. Photography: Frieder Blickle                                                       |                                                                                     |              |                           |                           |                                                 |
| luminous space 15 + variations | 15a                                                                                                                   |  | II penumbra  |                           |                           |                                                 |
|                                | 15b                                                                                                                   |  | I opaque     |                           |                           |                                                 |
|                                | 15c                                                                                                                   |  | III bright   | 20,16% <b>I like it</b>   | 25,44% <b>interesting</b> | 27,5% <b>I like it</b><br>27,5% <b>exciting</b> |
|                                | Fuente: © ERCO GmbH, www.erco.com. Jackie Chan, Sydney / Australien                                                   |                                                                                     |              |                           |                           |                                                 |
