# Supplementary material for: Exploring Urban Lighting Design Effect on Citizens’ Emotions through the Application of Kansei <span aria-describedby="tippy-44">Methodology
Source: Preprints.org preprint supplement (doi:10.20944/preprints202405.1129.v1), 2024-05-17
Supplement: Supplementary file 3 [file supplementary]

| Variable 1                                                                                                     | Variable 3<br>PERÚ   SPAIN |   |                  | Variable 3<br>optimized | Variable 3<br>GERMANY |   |                               | Variable 3<br>optimized |
|----------------------------------------------------------------------------------------------------------------|----------------------------|---|------------------|-------------------------|-----------------------|---|-------------------------------|-------------------------|
| <b>Espacio luminoso 1</b><br>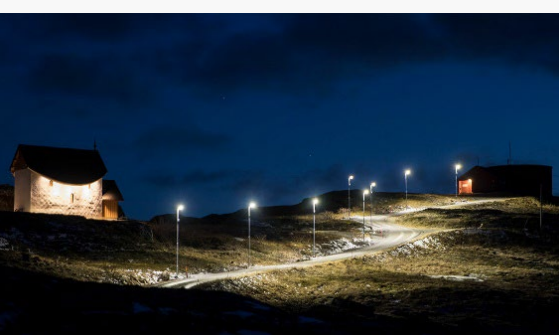 | D                          | 4 | restlessness     | <b>restlessness</b>     | F                     | 5 | security                      | <b>security</b>         |
|                                                                                                                | F                          | 5 | trust            | <b>trust</b>            | F<br>D                | 1 | I like it<br>I do not like it | <b>I like it</b>        |
|                                                                                                                | D                          | 1 | I do not like it | <b>unpleasant</b>       | F                     | 7 | exciting                      | <b>exciting</b>         |

Fuente:SITECO\_Streetlighting\_Traena. Traena/1. www.siteco.de

|                                                                                                                |   |   |              |                     |   |    |                  |                         |
|----------------------------------------------------------------------------------------------------------------|---|---|--------------|---------------------|---|----|------------------|-------------------------|
| <b>Espacio luminoso 2</b><br> | F | 1 | I like it    | <b>I like it</b>    | F | 1  | I like it        | <b>cozy</b>             |
|                                                                                                                | F | 7 | relaxing     | <b>relaxing</b>     | F | 3  | feel comfortable | <b>feel comfortable</b> |
|                                                                                                                | F | 4 | tranquillity | <b>tranquillity</b> | F | 10 | harmonizes       | <b>harmonizes</b>       |

Fuente: SITECO\_Streetlighting\_Balgheim. Gemeidne Balheim/1. www.siteco.de

|                                                                                                                 |   |    |             |                    |   |   |                  |                         |
|-----------------------------------------------------------------------------------------------------------------|---|----|-------------|--------------------|---|---|------------------|-------------------------|
| <b>Espacio luminoso 3</b><br> | F | 2  | interesting | <b>interesting</b> | D | 1 | I do not like it | <b>I do not like it</b> |
|                                                                                                                 | F | 10 | harmonizes  | <b>harmonizes</b>  | D | 2 | boring           | <b>boring</b>           |
|                                                                                                                 | F | 10 | I like it   | <b>attractive</b>  | F | 2 | exciting         | <b>enthusiasm</b>       |

Fuente: © ERCO GmbH, www.erco.com. Photography: Dirk Vogel, Dortmund / Deutschland

|                                                                                                                  |   |    |                  |                    |   |    |                  |                   |
|------------------------------------------------------------------------------------------------------------------|---|----|------------------|--------------------|---|----|------------------|-------------------|
| <b>Espacio luminoso 4</b><br> | F | 1  | I like it        | <b>liking</b>      | F | 1  | I like it        | <b>liking</b>     |
|                                                                                                                  | F | 10 | harmonizes       | <b>disturb</b>     | D | 1  | I do not like it | <b>cozy</b>       |
|                                                                                                                  | D | 1  | I do not like it |                    | F | 10 | harmonizes□      | <b>harmonizes</b> |
|                                                                                                                  | F | 2  | interesting      | <b>interesting</b> |   |    |                  |                   |

Fuente: © ERCO GmbH, www.erco.com. Photography: Dirk Vogel, Dortmund / Deutschland

|                                                                                                                  |   |    |             |                  |   |   |                                |                         |
|------------------------------------------------------------------------------------------------------------------|---|----|-------------|------------------|---|---|--------------------------------|-------------------------|
| <b>Espacio luminoso 5</b><br> | F | 1  | I like it   | <b>I like it</b> | F | 1 | I like it                      | <b>I like it</b>        |
|                                                                                                                  | F | 6  | vitality    | <b>vitality</b>  | F | 3 | feel comfortable<br>harmonizes | <b>feel comfortable</b> |
|                                                                                                                  | F | 2  | interesting | <b>happiness</b> | F | 8 | attractive                     | <b>attractive</b>       |
|                                                                                                                  |   | 10 | harmonizes  |                  |   |   |                                |                         |

Fuente: © ERCO GmbH, www.erco.com. Photography: Thomas Mayer, Neuss

|                                                                                                                  |   |   |              |                   |   |   |                                |                         |
|------------------------------------------------------------------------------------------------------------------|---|---|--------------|-------------------|---|---|--------------------------------|-------------------------|
| <b>Espacio luminoso 6</b><br> | F | 1 | I like it    | <b>attractive</b> | F | 3 | feel comfortable               | <b>feel comfortable</b> |
|                                                                                                                  | F | 5 | trust        | <b>trust</b>      | F | 1 | I like it                      | <b>I like it</b>        |
|                                                                                                                  | F | 4 | tranquillity | <b>calm</b>       | F | 5 | attractive<br>I do not like it | <b>security</b>         |
|                                                                                                                  | D |   |              |                   | D |   |                                |                         |

Fuente: © ERCO GmbH, www.erco.com. Photography: Dirk Vogel

|                                                                                                                  |   |   |                  |                  |   |   |                          |                         |
|------------------------------------------------------------------------------------------------------------------|---|---|------------------|------------------|---|---|--------------------------|-------------------------|
| <b>Espacio luminoso 7</b><br> | F | 9 | socialize        | <b>socialize</b> | D | 1 | I do not like it         | <b>I do not like it</b> |
|                                                                                                                  | F | 6 | vitality         | <b>vitality</b>  | D | 4 | restlessness  <br>strain | <b>restlessness</b>     |
|                                                                                                                  | D | 1 | I do not like it | <b>tasteless</b> | D | 2 | boring                   | <b>boring</b>           |

Fuente: © ERCO GmbH, www.erco.com. Photography: Dirk Vogel



| Variable 1                                                                                                     | Variable 3<br>PERÚ   SPAIN |    |             | Variable 3<br>optimized | Variable 3<br>GERMANY |   |                                                            | Variable 3<br>optimized |
|----------------------------------------------------------------------------------------------------------------|----------------------------|----|-------------|-------------------------|-----------------------|---|------------------------------------------------------------|-------------------------|
| <b>Espacio luminoso 8</b><br> | F                          | 2  | interesting | <b>interesting</b>      | F                     | 2 | exciting                                                   | <b>exciting</b>         |
|                                                                                                                | F                          | 1  | I like it   | <b>I like it</b>        | F<br>D                | 8 | I like it   harmonizes<br>attractive   I do not like<br>it | <b>attractive</b>       |
|                                                                                                                | F                          | 10 | harmonizes  | <b>harmonizes</b>       | F                     | 9 | socialize                                                  | <b>socialize</b>        |

Fuente: ZUMTOBEL group, www.zumtobel.com. Photography: xxx

|                                                                                                                |   |   |             |                   |   |   |                       |                   |
|----------------------------------------------------------------------------------------------------------------|---|---|-------------|-------------------|---|---|-----------------------|-------------------|
| <b>Espacio luminoso 9</b><br>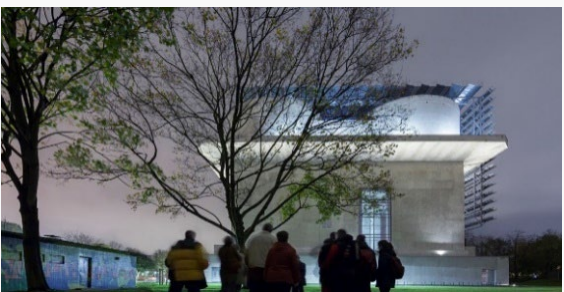 | F | 1 | I like it   | <b>attractive</b> | F | 2 | I like it<br>exciting | <b>exciting</b>   |
|                                                                                                                | F | 2 | interesting | <b>enthusiasm</b> | F | 8 | attractive            | <b>attractive</b> |
|                                                                                                                | F | 6 | vitality    | <b>vitality</b>   | D | 1 | I do not like it      | <b>charmless</b>  |

Fuente: © ERCO GmbH, www.erco.com. Photography: Frieder Blickle, Hamburg

|                                                                                                                   |   |    |                     |                             |   |    |                     |                             |
|-------------------------------------------------------------------------------------------------------------------|---|----|---------------------|-----------------------------|---|----|---------------------|-----------------------------|
| <b>Espacio luminoso 10</b><br>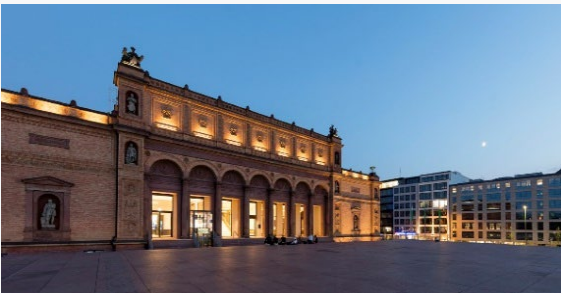 | F | 1  | I like it           | <b>I like it</b>            | F | 1  | I like it           | <b>I like it</b>            |
|                                                                                                                   | F | 10 | harmonizes          | <b>harmonizes</b>           | F | 10 | harmonizes          | <b>harmonizes</b>           |
|                                                                                                                   | F | 8  | pride<br>(identity) | <b>pride<br/>(identity)</b> | F | 3  | feel<br>comfortable | <b>feel<br/>comfortable</b> |

Fuente: © ERCO GmbH, www.erco.com. Photography: Frieder Blickle, Hamburg / Deutschland

|                                                                                                                   |   |   |                     |                             |   |    |                         |                   |
|-------------------------------------------------------------------------------------------------------------------|---|---|---------------------|-----------------------------|---|----|-------------------------|-------------------|
| <b>Espacio luminoso 11</b><br> | F | 1 | I like it           | <b>liking</b>               | F | 8  | attractive<br>I like it | <b>attractive</b> |
|                                                                                                                   | F | 8 | pride<br>(identity) | <b>pride<br/>(identity)</b> | F | 2  | exciting                | <b>exciting</b>   |
|                                                                                                                   | F | 2 | interesting         | <b>interesting</b>          | F | 10 | harmonizes□             | <b>harmonizes</b> |

Fuente: © ERCO GmbH, www.erco.com. Photography: Frieder Blickle, Hamburg / Deutschland

|                                                                                                                   |   |        |                               |                   |   |    |            |                   |
|-------------------------------------------------------------------------------------------------------------------|---|--------|-------------------------------|-------------------|---|----|------------|-------------------|
| <b>Espacio luminoso 12</b><br> | F | 1<br>8 | I like it<br>pride (identity) | <b>attractive</b> | F | 1  | I like it  | <b>cozy</b>       |
|                                                                                                                   | F | 2      | interesting                   | <b>enthusiasm</b> | F | 10 | harmonizes | <b>harmonizes</b> |
|                                                                                                                   | F | 10     | harmonizes                    | <b>harmonizes</b> | F | 2  | exciting   | <b>exciting</b>   |

Fuente: © ERCO GmbH, www.erco.com. Photography: Moritz Hillebrand, Zürich/Schweiz, Timm Lange, Düsseldorf/Deutschland

|                                                                                                                   |   |   |                  |                    |        |    |                                                |                   |
|-------------------------------------------------------------------------------------------------------------------|---|---|------------------|--------------------|--------|----|------------------------------------------------|-------------------|
| <b>Espacio luminoso 13</b><br>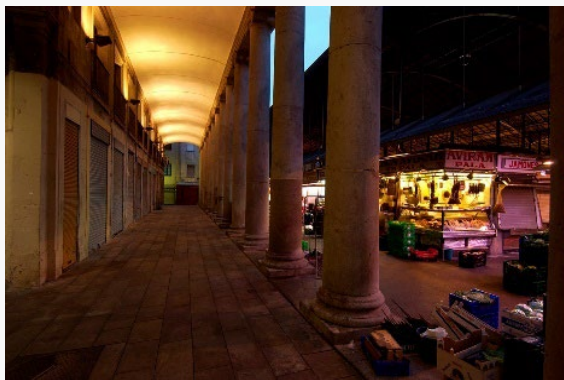 | F | 2 | interesting      | <b>interesting</b> | F      | 1  | I like it                                      | <b>I like it</b>  |
|                                                                                                                   | F | 4 | tranquillity     | <b>calm</b>        | F<br>D | 10 | feel comfortable  <br>harmonizes<br>discomfort | <b>harmonizes</b> |
|                                                                                                                   | D | 1 | I do not like it | <b>unpleasant</b>  | F<br>D | 7  | relaxing<br>exciting<br>I do not like it       | <b>relaxing</b>   |

Fuente: © ERCO GmbH, www.erco.com. Photography: Thomas Mayer, Neuss

|                                                                                                                   |   |        |                          |                   |   |   |           |                  |
|-------------------------------------------------------------------------------------------------------------------|---|--------|--------------------------|-------------------|---|---|-----------|------------------|
| <b>Espacio luminoso 14</b><br> | F | 6      | vitality                 | <b>vitality</b>   | D | 7 | stressful | <b>stressful</b> |
|                                                                                                                   | F | 1      | I like it                | <b>attractive</b> | F | 1 | I like it | <b>I like it</b> |
|                                                                                                                   | D | 2<br>7 | interesting<br>stressful | <b>stressful</b>  | F | 2 | exciting  | <b>exciting</b>  |

Fuente: © ERCO GmbH, www.erco.com. Photography: Frieder Blickle

|                                                                                                                   |   |    |             |                    |   |    |                          |                   |
|-------------------------------------------------------------------------------------------------------------------|---|----|-------------|--------------------|---|----|--------------------------|-------------------|
| <b>Espacio luminoso 15</b><br>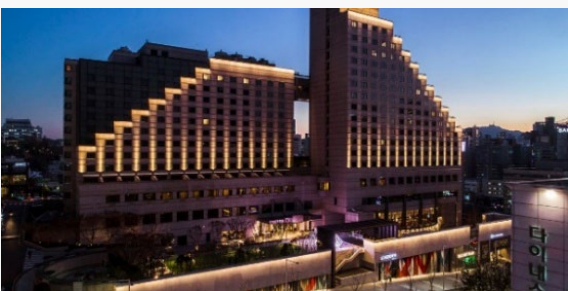 | F | 2  | interesting | <b>interesting</b> | F | 2  | exciting                 | <b>exciting</b>   |
|                                                                                                                   | F | 1  | I like it   | <b>I like it</b>   | F | 1  | I like it□               | <b>I like it</b>  |
|                                                                                                                   | F | 10 | harmonizes  | <b>harmonizes</b>  | F | 10 | harmonizes<br>attractive | <b>harmonizes</b> |

Fuente: © ERCO GmbH, www.erco.com. Jackie Chan, Sydney / Australien

| category of the<br>luminous space |               | Perú               | Spain              | Germany            | category of the<br>perception |
|-----------------------------------|---------------|--------------------|--------------------|--------------------|-------------------------------|
| 1b                                | III - BRIGHT  | <b>trust</b>       |                    | <b>fascinating</b> | FAVOURABLE                    |
| 2a                                | III - BRIGHT  | <b>I like it</b>   |                    | <b>lively</b>      | FAVOURABLE                    |
| 3c                                | III - BRIGHT  | <b>attractive</b>  |                    | <b>enthusiasm</b>  | FAVOURABLE                    |
| 4a                                | III - BRIGHT  |                    | <b>liking</b>      |                    | FAVOURABLE                    |
| 5b                                | III - BRIGHT  | <b>vitality</b>    | <b>happiness</b>   | <b>attractive</b>  | FAVOURABLE                    |
| 6c                                | III - BRIGHT  | <b>trust</b>       | <b>attractive</b>  | <b>seguridad</b>   | FAVOURABLE                    |
| 7b                                | III - BRIGHT  |                    | <b>vitality</b>    |                    | FAVOURABLE                    |
| 8c                                | III - BRIGHT  | <b>I like it</b>   |                    |                    | FAVOURABLE                    |
| 8b                                | II - PENUMBRA |                    |                    | <b>attractive</b>  | FAVOURABLE                    |
|                                   |               |                    |                    | <b>socialize</b>   | FAVOURABLE                    |
| 9a                                | III - BRIGHT  | <b>enthusiasm</b>  |                    | <b>attractive</b>  | FAVOURABLE                    |
|                                   |               | <b>vitality</b>    |                    |                    | FAVOURABLE                    |
| 10b                               | III - BRIGHT  | <b>I like it</b>   |                    | <b>lively</b>      | FAVOURABLE                    |
| 11c                               | III - BRIGHT  | <b>liking</b>      | <b>interesting</b> | <b>attractive</b>  | FAVOURABLE                    |
| 12b                               | III - BRIGHT  |                    | <b>enthusiasm</b>  |                    | FAVOURABLE                    |
| 13a                               | III - BRIGHT  | <b>interesting</b> |                    | <b>I like it</b>   | FAVOURABLE                    |
| 14a                               | III - BRIGHT  | <b>vitality</b>    |                    | <b>I like it</b>   | FAVOURABLE                    |
| 15c                               | III - BRIGHT  | <b>I like it</b>   | <b>interesting</b> | <b>fascinating</b> | FAVOURABLE                    |

| categoría del<br>espacio luminoso |            | Perú | Spain | Germany                | categoría de la<br>percepción |
|-----------------------------------|------------|------|-------|------------------------|-------------------------------|
| 1c                                | I - OPAQUE |      |       | <b>I don't like it</b> | UNFAVOURABLE                  |
| 7a                                | I - OPAQUE |      |       | <b>I don't like it</b> | UNFAVOURABLE                  |
