# Supplementary material for: Exploring Urban Lighting Design Effect on Citizens’ Emotions through the Application of Kansei <span aria-describedby="tippy-44">Methodology
Source: Preprints.org preprint supplement (doi:10.20944/preprints202405.1129.v1), 2024-05-17
Supplement: Supplementary file 4 [file supplementary]

| Luminous spaces |                                                                                     | category       | urban elements                                     | Lighting Parameters Values                 |                                 |
|-----------------|-------------------------------------------------------------------------------------|----------------|----------------------------------------------------|--------------------------------------------|---------------------------------|
|                 |                                                                                     |                |                                                    | Illuminance (Lux)                          | Colour temperature (Kelvin)     |
| 1a              |    | II<br>penumbra | Building facade:<br><br>Path:<br><br>Surroundings: | clara 3 a 5<br>claro 3 a 7<br>dark 0 a 1   | cold 4000<br>cold 4000<br>— —   |
| 1b              |    | III<br>bright  | Building facade:<br><br>Path:<br><br>Surroundings: | clara 5 a 10<br>claro 5 a 10<br>dark 0 a 3 | warm 3000<br>cold 4000<br>— —   |
| 1c              |  | I<br>opaco     | Building facade:<br><br>Path:<br><br>Surroundings: | dark 0 a 1<br>claro 1 a 3<br>dark 0        | — —<br>cold 4000<br>— —         |
| 2a              |  | III<br>bright  | Tower :<br><br>Path:<br><br>Surroundings:          | clara 3 a 7<br>claro 5 a 10<br>dark 0      | warm 3000<br>cálido 3000<br>— — |
| 2b              |  | II<br>penumbra | Tower :<br><br>Path:<br><br>Surroundings:          | clara 1 a 5<br>claro 3 a 5<br>dark 0       | cold 4000<br>cold 4000<br>— —   |
| 2c              |  | I<br>opaco     | Tower :<br><br>Path:<br><br>Surroundings:          | oscura 0<br>dark 1 a 3<br>dark 0           | — —<br>cold 0<br>— —            |

|    |                                                                                     |                |                                                       |                                          |                               |
|----|-------------------------------------------------------------------------------------|----------------|-------------------------------------------------------|------------------------------------------|-------------------------------|
| 3a | 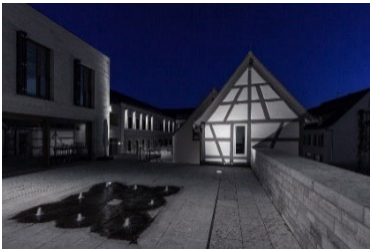   | II<br>penumbra | Building facade:<br><br>Plaza:<br><br>Surroundings:   | clara 1 a 5<br>clara 1 a 3<br>dark 0 a 2 | cold 4000<br>cold 4000<br>— — |
| 3b |    | I<br>opaco     | Building facade:<br><br>Plaza:<br><br>Surroundings:   | oscura 0 a 1<br>oscura 0<br>dark 0       | — —<br>— —<br>— —             |
| 3c |    | III<br>bright  | Building facade:<br><br>Plaza:<br><br>Surroundings:   | clara 3 a 7<br>clara 3 a 5<br>dark 0 a 3 | warm 3000<br>cold 4000<br>— — |
| 4a |  | III<br>bright  | Building facade:<br><br>Streets:<br><br>Surroundings: | clara 3 a 7<br>clara 1 a 5<br>dark —     | warm 3000<br>warm 3000<br>— — |
| 4b |  | I<br>opaco     | Building facade:<br><br>Streets:<br><br>Surroundings: | dark —<br>dark —<br>dark —               | — —<br>— —<br>— —             |
| 4c |  | II<br>penumbra | Building facade:<br><br>Streets:<br><br>Surroundings: | clara 1 a 5<br>clara 1 a 5<br>dark —     | cold 4000<br>cold 4000<br>— — |

|    |                                                                                   |                |                                       |                                  |                              |
|----|-----------------------------------------------------------------------------------|----------------|---------------------------------------|----------------------------------|------------------------------|
| 5a |  | II<br>penumbra | Building facade:<br><br>Surroundings: | clara 5 a 10<br><br>claro 5 a 10 | cold 4000<br><br>cold 4000   |
| 5b |  | III<br>bright  | Building facade:<br><br>Surroundings: | clara 5 a 10<br><br>claro 5 a 10 | warm 3000<br><br>cálido 3000 |
| 5c |  | I<br>opaco     | Building facade:<br><br>Surroundings: | dark 0 a 3<br><br>dark 0 a 3     | warm 3000<br><br>cálido 3000 |

| Luminous spaces |                                                                                     | category    | urban elements                                        | Lighting Parameters Values                       |                                                 |
|-----------------|-------------------------------------------------------------------------------------|-------------|-------------------------------------------------------|--------------------------------------------------|-------------------------------------------------|
|                 |                                                                                     |             |                                                       | Illuminance (Lux)                                | Colour temperature (Kelvin)                     |
| 6a              |    | I opaco     | Building facade:<br><br>Surroundings:                 | oscura 0 a 3<br><br>dark 0 a 3                   | cold 4000<br><br>cold 4000                      |
| 6b              |    | II penumbra | Building facade:<br><br>Surroundings:                 | clara 1 a 5<br><br>claro 1 a 5                   | cold 4000<br><br>cold 4000                      |
| 6c              |   | III bright  | Building facade:<br><br>Surroundings:                 | clara 1 a 5<br><br>claro 1 a 5                   | warm 3000<br><br>cálido 3000                    |
| 7a              |  | I opaco     | Building facade:<br><br>Streets:<br><br>Surroundings: | oscura 0 a 2<br><br>oscura 0<br><br>dark 0       | cold 4000<br><br>— —<br><br>— —                 |
| 7b              |  | III bright  | Building facade:<br><br>Streets:<br><br>Surroundings: | clara 3 a 7<br><br>clara 1 a 5<br><br>dark 1 a 3 | cálido 3000<br><br>cold 4000<br><br>cálido 3000 |
| 7c              |  | II penumbra | Building facade:<br><br>Streets:<br><br>Surroundings: | clara 3 a 7<br><br>clara 1 a 5<br><br>dark 1 a 3 | cold 4000<br><br>cold 4000<br><br>— —           |



|    |                                                                                     |                |                                       |                                 |                              |
|----|-------------------------------------------------------------------------------------|----------------|---------------------------------------|---------------------------------|------------------------------|
| 8a |    | I<br>opaco     | Building facade:<br><br>Plaza:        | oscura 0<br><br>clara 3 a 5     | — —<br><br>cold 4000         |
| 8b |    | II<br>penumbra | Building facade:<br><br>Plaza:        | clara 5 a 10<br><br>clara 3 a 5 | cold 4000<br><br>cold 4000   |
| 8c |    | III<br>bright  | Building facade:<br><br>Plaza:        | clara 5 a 10<br><br>clara 3 a 5 | cálido 3000<br><br>cold 4000 |
| 9a |  | III<br>bright  | Building facade:<br><br>Surroundings: | clara 5 a 10<br><br>claro 3 a 5 | warm 3000<br><br>cálido 3000 |
| 9b |  | I<br>opaco     | Building facade:<br><br>Surroundings: | oscura 0<br><br>dark 0          | — —<br><br>— —               |
| 9c |  | II<br>penumbra | Building facade:<br><br>Surroundings: | clara 5 a 10<br><br>claro 3 a 5 | cold 4000<br><br>cold 4000   |

|     |                                                                                   |                |                                                     |                                             |                                           |
|-----|-----------------------------------------------------------------------------------|----------------|-----------------------------------------------------|---------------------------------------------|-------------------------------------------|
| 10a | 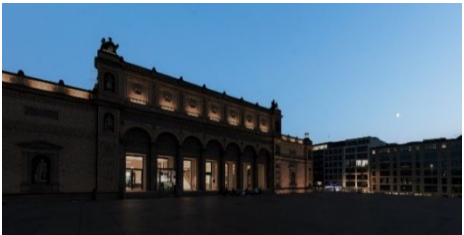 | I<br>opaco     | Building facade:<br><br>Plaza:<br><br>Surroundings: | oscura 0<br>dark 0<br>dark 0                | — —<br>— —<br>— —                         |
| 10b |  | III<br>bright  | Building facade:<br><br>Plaza:<br><br>Surroundings: | claro 5 a 15<br>oscura 1 a 3<br>claro 1 a 5 | cálido 3000<br>warm 3000<br>cálido 3000   |
| 10c |  | II<br>penumbra | Building facade:<br><br>Plaza:<br><br>Surroundings: | claro 5 a 10<br>oscura 0 a 3<br>dark 0 a 3  | cálido 3000<br>cálido 3000<br>cálido 3000 |

| Luminous spaces |                                                                                     | category       | urban elements   | Lighting Parameters Values |                             |
|-----------------|-------------------------------------------------------------------------------------|----------------|------------------|----------------------------|-----------------------------|
|                 |                                                                                     |                |                  | Illuminance (Lux)          | Colour temperature (Kelvin) |
| 11a             | 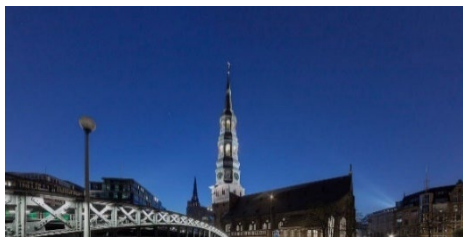   | II<br>penumbra | Tower:           | clara 5 a 10               | cálido 3000                 |
|                 |                                                                                     |                | Bridge:          | claro 3 a 5                | cálido 3000                 |
|                 |                                                                                     |                | Surroundings:    | dark 0 a 3                 | cold 4000                   |
| 11b             |    | I<br>opaco     | Tower :          | dark 5 a 10                | cálido 3000                 |
|                 |                                                                                     |                | Bridge:          | dark 3 a 5                 | cálido 3000                 |
|                 |                                                                                     |                | Surroundings:    | dark 0 a 3                 | — —                         |
| 11c             |   | III<br>bright  | Tower:           | clara 5 a 15               | cálido 3000                 |
|                 |                                                                                     |                | Bridge:          | claro 3 a 7                | cálido 3000                 |
|                 |                                                                                     |                | Surroundings:    | claro 0 a 3                | cálido 3000                 |
| 12a             |  | I<br>opaco     | Building facade: | dark —                     | — —                         |
|                 |                                                                                     |                | Plaza:           | dark —                     | — —                         |
|                 |                                                                                     |                | Surroundings:    | dark 0 a 1                 | cálido 3000                 |
| 12b             |  | III<br>bright  | Building facade: | claro 1 a 3                | warm 3000                   |
|                 |                                                                                     |                | Plaza:           | dark 0 a 2                 | oscura 3000                 |
|                 |                                                                                     |                | Surroundings:    | claro 3 a 5                | cálido 3000                 |
| 12c             |  | II<br>penumbra | Building facade: | claro 1 a 3                | cold 4000                   |
|                 |                                                                                     |                | Plaza:           | dark 0                     | — —                         |
|                 |                                                                                     |                | Surroundings:    | claro 3 a 5                | cold 4000                   |
|                 |  |                | Porch of arches: | clara 5 a 15               | warm 3000                   |

|     |                                                                                   |                 |                                                    |                                                    |                                             |
|-----|-----------------------------------------------------------------------------------|-----------------|----------------------------------------------------|----------------------------------------------------|---------------------------------------------|
| 13a |  | III<br>bright   | Path:<br><br>Surroundings:                         | claro 1 a 3<br><br>claro 1 a 5                     | cálido 3000<br><br>cálido 3000              |
| 13b |  | I<br>opaco      | Porch of arches:<br><br>Path:<br><br>Surroundings: | clara 5 a 10<br><br>dark 0<br><br>claro 1 a 3      | cálido 3000<br><br>— —<br><br>cold 3000     |
| 13c |  | III<br>penumbra | Porch of arches:<br><br>Path:<br><br>Surroundings: | clara 5 a 10<br><br>claro 0 a 3<br><br>claro 1 a 3 | cold 4000<br><br>cold 4000<br><br>cold 4000 |



|     |                                                                                     |                |                                       |                                  |                                |
|-----|-------------------------------------------------------------------------------------|----------------|---------------------------------------|----------------------------------|--------------------------------|
| 14a |    | III<br>bright  | Building facade:<br><br>Streets:      | clara 5 a 10<br><br>claro 5 a 15 | cálido 3000<br><br>cálido 3000 |
| 14b |    | II<br>penumbra | Building facade:<br><br>Streets:      | clara 5 a 10<br><br>claro 5 a 15 | cold 4000<br><br>cold 4000     |
| 14c |    | I<br>opaco     | Building facade:<br><br>Streets:      | oscura 1 a 5<br><br>dark 0       | cold 4000<br><br>— —           |
| 15a |  | II<br>penumbra | Building facade:<br><br>Surroundings: | clara 5 a 10<br><br>claro 3 a 5  | cold 4000<br><br>cold 4000     |
| 15b |  | I<br>opaco     | Building facade:<br><br>Surroundings: | oscura 0<br><br>dark 0           | — —<br><br>— —                 |
| 15c |  | III<br>bright  | Building facade:<br><br>Surroundings: | clara 5 a 10<br><br>claro 3 a 5  | warm 3000<br><br>cálido 3000   |

Lista de descriptores estéticos | idioma inglés

|                 |    | favourable                                       | unfavourable                                          | neutral                | indifferent |
|-----------------|----|--------------------------------------------------|-------------------------------------------------------|------------------------|-------------|
| emotional group | 1  | I like it<br>liking<br>attractive<br>fascinating | I don't like it<br>disgust<br>tasteless<br>unpleasant |                        |             |
|                 | 2  | interesting<br>happiness<br>enthusiasm           | boring<br>sadness                                     |                        | apathy      |
|                 | 3  | comfortable<br>wellbeing                         | uncomfortable<br>discomfort                           |                        |             |
|                 | 4  | tranquillity<br>calm                             | restlessness<br>suspense                              |                        |             |
|                 | 5  | trust<br>security                                | fear<br>unsafety                                      |                        |             |
|                 | 6  | vitality                                         | exhaustion                                            |                        |             |
|                 | 7  | relaxing                                         | stressful                                             |                        |             |
|                 | 8  | pride<br>(identity)                              | rejection                                             |                        |             |
|                 | 9  | socialise<br>(outgoing)                          |                                                       | isolate<br>(introvert) |             |
|                 | 10 | harmonises                                       | disturbs                                              |                        |             |
