# Supplementary material for: Exploring Urban Lighting Design Effect on Citizens’ Emotions through the Application of Kansei <span aria-describedby="tippy-44">Methodology
Source: Preprints.org preprint supplement (doi:10.20944/preprints202405.1129.v1), 2024-05-17
Supplement: Supplementary file 5 [file supplementary]

|            |        |         |          |           |       |           |              |            |        |          |             |               |          |               |          |           |                 |              |           |
|------------|--------|---------|----------|-----------|-------|-----------|--------------|------------|--------|----------|-------------|---------------|----------|---------------|----------|-----------|-----------------|--------------|-----------|
| Perú       |        |         |          |           |       |           |              |            |        |          |             |               |          |               |          |           |                 |              |           |
| ATRIBUTOS  | agrado | alegria | armoniza | atractivo | calma | confianza | desagradable | entusiasmo | estres | insipido | interesante | intranquilida | me gusta | orgullo (iden | perturba | relajante | sociabilizar (i | tranquilidad | vitalidad |
| escena 1a  | 0      | 0       | 0        | 0         | 0     | 5         | 5            | 0          | 0      | 0        | 0           | 4             | 0        | 0             | 0        | 0         | 0               | 0            | 0         |
| escena 1b  | 0      | 0       | 0        | 0         | 0     | 37        | 4            | 0          | 0      | 0        | 0           | 13            | 0        | 0             | 0        | 0         | 0               | 0            | 0         |
| escena 1c  | 0      | 0       | 0        | 0         | 0     | 1         | 34           | 0          | 0      | 0        | 0           | 26            | 0        | 0             | 0        | 0         | 0               | 0            | 0         |
| escena 2a  | 0      | 0       | 0        | 0         | 0     | 0         | 0            | 0          | 0      | 0        | 0           | 0             | 41       | 0             | 0        | 27        | 0               | 36           | 0         |
| escena 2b  | 0      | 0       | 0        | 0         | 0     | 0         | 0            | 0          | 0      | 0        | 0           | 0             | 1        | 0             | 0        | 13        | 0               | 6            | 0         |
| escena 2c  | 0      | 0       | 0        | 0         | 0     | 0         | 0            | 0          | 0      | 0        | 0           | 0             | 1        | 0             | 0        | 3         | 0               | 1            | 0         |
| escena 3a  | 0      | 0       | 14       | 5         | 0     | 0         | 0            | 0          | 0      | 0        | 7           | 0             | 0        | 0             | 0        | 0         | 0               | 0            | 0         |
| escena 3b  | 0      | 0       | 2        | 1         | 0     | 0         | 0            | 0          | 0      | 0        | 0           | 0             | 0        | 0             | 0        | 0         | 0               | 0            | 0         |
| escena 3c  | 0      | 0       | 27       | 37        | 0     | 0         | 0            | 0          | 0      | 0        | 36          | 0             | 0        | 0             | 0        | 0         | 0               | 0            | 0         |
| escena 4a  | 38     | 0       | 0        | 0         | 0     | 0         | 0            | 0          | 0      | 0        | 32          | 0             | 0        | 0             | 10       | 0         | 0               | 0            | 0         |
| escena 4b  | 0      | 0       | 0        | 0         | 0     | 0         | 0            | 0          | 0      | 0        | 1           | 0             | 0        | 0             | 23       | 0         | 0               | 0            | 0         |
| escena 4c  | 5      | 0       | 0        | 0         | 0     | 0         | 0            | 0          | 0      | 0        | 10          | 0             | 0        | 0             | 10       | 0         | 0               | 0            | 0         |
| escena 5a  | 0      | 7       | 0        | 0         | 0     | 0         | 0            | 0          | 0      | 0        | 0           | 0             | 8        | 0             | 0        | 0         | 0               | 0            | 6         |
| escena 5b  | 0      | 36      | 0        | 0         | 0     | 0         | 0            | 0          | 0      | 0        | 0           | 0             | 34       | 0             | 0        | 0         | 0               | 0            | 37        |
| escena 5c  | 0      | 0       | 0        | 0         | 0     | 0         | 0            | 0          | 0      | 0        | 0           | 0             | 1        | 0             | 0        | 0         | 0               | 0            | 0         |
| escena 6a  | 0      | 0       | 0        | 5         | 8     | 1         | 0            | 0          | 0      | 0        | 0           | 0             | 0        | 0             | 0        | 0         | 0               | 0            | 0         |
| escena 6b  | 0      | 0       | 0        | 11        | 12    | 14        | 0            | 0          | 0      | 0        | 0           | 0             | 0        | 0             | 0        | 0         | 0               | 0            | 0         |
| escena 6c  | 0      | 0       | 0        | 27        | 22    | 28        | 0            | 0          | 0      | 0        | 0           | 0             | 0        | 0             | 0        | 0         | 0               | 0            | 0         |
| escena 7a  | 0      | 0       | 0        | 0         | 0     | 0         | 0            | 0          | 0      | 30       | 0           | 0             | 0        | 0             | 0        | 0         | 0               | 0            | 0         |
| escena 7b  | 0      | 0       | 0        | 0         | 0     | 0         | 0            | 0          | 0      | 6        | 0           | 0             | 0        | 0             | 0        | 0         | 37              | 0            | 39        |
| escena 7c  | 0      | 0       | 0        | 0         | 0     | 0         | 0            | 0          | 0      | 7        | 0           | 0             | 0        | 0             | 0        | 0         | 6               | 0            | 4         |
| escena 8a  | 0      | 0       | 9        | 0         | 0     | 0         | 0            | 0          | 0      | 0        | 7           | 0             | 4        | 0             | 0        | 0         | 0               | 0            | 0         |
| escena 8b  | 0      | 0       | 15       | 0         | 1     | 0         | 0            | 0          | 0      | 0        | 15          | 0             | 11       | 0             | 0        | 0         | 0               | 0            | 0         |
| escena 8c  | 0      | 0       | 19       | 0         | 0     | 0         | 0            | 0          | 0      | 0        | 21          | 0             | 28       | 0             | 0        | 0         | 0               | 0            | 0         |
| escena 9a  | 0      | 0       | 0        | 34        | 0     | 0         | 0            | 39         | 0      | 0        | 0           | 0             | 0        | 0             | 0        | 0         | 0               | 0            | 39        |
| escena 9b  | 0      | 0       | 0        | 1         | 0     | 0         | 0            | 0          | 0      | 0        | 0           | 0             | 0        | 0             | 0        | 0         | 0               | 0            | 0         |
| escena 9c  | 0      | 0       | 0        | 8         | 0     | 0         | 0            | 4          | 0      | 0        | 0           | 0             | 0        | 0             | 0        | 0         | 0               | 0            | 4         |
| escena 10a | 0      | 0       | 2        | 0         | 0     | 0         | 0            | 0          | 0      | 0        | 0           | 0             | 1        | 1             | 0        | 0         | 0               | 0            | 0         |
| escena 10b | 0      | 0       | 24       | 0         | 0     | 0         | 0            | 0          | 0      | 0        | 0           | 0             | 29       | 27            | 0        | 0         | 0               | 0            | 0         |
| escena 10c | 0      | 0       | 17       | 0         | 0     | 0         | 0            | 0          | 0      | 0        | 0           | 0             | 13       | 15            | 0        | 0         | 0               | 0            | 0         |
| escena 11a | 9      | 0       | 0        | 0         | 0     | 0         | 0            | 0          | 0      | 0        | 12          | 0             | 0        | 9             | 0        | 0         | 0               | 0            | 0         |
| escena 11b | 2      | 0       | 0        | 0         | 0     | 0         | 0            | 0          | 0      | 0        | 3           | 0             | 0        | 4             | 0        | 0         | 0               | 0            | 0         |
| escena 11c | 32     | 0       | 0        | 0         | 0     | 0         | 0            | 0          | 0      | 0        | 28          | 0             | 0        | 30            | 0        | 0         | 0               | 0            | 0         |
| escena 12a | 0      | 0       | 4        | 0         | 0     | 0         | 0            | 0          | 0      | 0        | 0           | 0             | 0        | 0             | 0        | 0         | 0               | 0            | 0         |
| escena 12b | 0      | 0       | 31       | 37        | 0     | 0         | 0            | 39         | 0      | 0        | 0           | 0             | 0        | 0             | 0        | 0         | 0               | 0            | 0         |
| escena 12c | 0      | 0       | 8        | 6         | 0     | 0         | 0            | 4          | 0      | 0        | 0           | 0             | 0        | 0             | 0        | 0         | 0               | 0            | 0         |
| escena 13a | 0      | 0       | 0        | 0         | 23    | 0         | 7            | 0          | 0      | 0        | 32          | 0             | 0        | 0             | 0        | 0         | 0               | 0            | 0         |
| escena 13b | 0      | 0       | 0        | 0         | 3     | 0         | 28           | 0          | 0      | 0        | 0           | 0             | 0        | 0             | 0        | 0         | 0               | 0            | 0         |
| escena 13c | 0      | 0       | 0        | 0         | 17    | 0         | 8            | 0          | 0      | 0        | 11          | 0             | 0        | 0             | 0        | 0         | 0               | 0            | 0         |
| escena 14a | 0      | 0       | 0        | 21        | 0     | 0         | 0            | 0          | 13     | 0        | 0           | 0             | 0        | 0             | 0        | 0         | 0               | 0            | 27        |
| escena 14b | 0      | 0       | 0        | 21        | 0     | 0         | 0            | 0          | 8      | 0        | 0           | 0             | 0        | 0             | 0        | 0         | 0               | 0            | 16        |
| escena 14c | 0      | 0       | 0        | 1         | 0     | 0         | 0            | 0          | 22     | 0        | 0           | 0             | 0        | 0             | 0        | 0         | 0               | 0            | 0         |
| escena 15a | 0      | 0       | 20       | 0         | 0     | 0         | 0            | 0          | 0      | 0        | 18          | 0             | 16       | 0             | 0        | 0         | 0               | 0            | 0         |
| escena 15b | 0      | 0       | 1        | 0         | 0     | 0         | 0            | 0          | 0      | 0        | 0           | 0             | 1        | 0             | 0        | 0         | 0               | 0            | 0         |
| escena 15c | 0      | 0       | 22       | 0         | 0     | 0         | 0            | 0          | 0      | 0        | 25          | 0             | 26       | 0             | 0        | 0         | 0               | 0            | 0         |

|            |        |         |          |           |       |           |             |             |            |        |          |             |               |          |               |          |           |                |              |           |
|------------|--------|---------|----------|-----------|-------|-----------|-------------|-------------|------------|--------|----------|-------------|---------------|----------|---------------|----------|-----------|----------------|--------------|-----------|
| España     |        |         |          |           |       |           |             |             |            |        |          |             |               |          |               |          |           |                |              |           |
| ATRIBUTOS  | agrado | alegria | armoniza | atractivo | calma | confianza | desagradabl | desagradabl | entusiasmo | estres | insipido | interesante | intranquilida | me gusta | orgullo (iden | perturba | relajante | sociabilizar ( | tranquilidad | vitalidad |
| escena 1a  | 0      | 0       | 0        | 0         | 0     | 8         | 0           | 15          | 0          | 0      | 0        | 0           | 5             | 0        | 0             | 0        | 0         | 0              | 0            | 0         |
| escena 1b  | 0      | 0       | 0        | 0         | 0     | 27        | 0           | 9           | 0          | 0      | 0        | 0           | 9             | 0        | 0             | 0        | 0         | 0              | 0            | 0         |
| escena 1c  | 0      | 0       | 0        | 0         | 0     | 0         | 0           | 11          | 0          | 0      | 0        | 0           | 21            | 0        | 0             | 0        | 0         | 0              | 0            | 0         |
| escena 2a  | 0      | 0       | 0        | 0         | 0     | 0         | 0           | 0           | 0          | 0      | 0        | 0           | 0             | 0        | 0             | 0        | 21        | 0              | 25           | 0         |
| escena 2b  | 0      | 0       | 0        | 0         | 0     | 0         | 0           | 0           | 0          | 0      | 0        | 0           | 0             | 29       | 0             | 0        | 10        | 0              | 7            | 0         |
| escena 2c  | 0      | 0       | 0        | 0         | 0     | 0         | 0           | 0           | 0          | 0      | 0        | 0           | 0             | 5        | 0             | 0        | 4         | 0              | 3            | 0         |
| escena 3a  | 0      | 0       | 10       | 11        | 0     | 0         | 0           | 0           | 0          | 0      | 0        | 17          | 0             | 1        | 0             | 0        | 0         | 0              | 0            | 0         |
| escena 3b  | 0      | 0       | 13       | 2         | 0     | 0         | 0           | 0           | 0          | 0      | 0        | 1           | 0             | 0        | 0             | 0        | 0         | 0              | 0            | 0         |
| escena 3c  | 0      | 0       | 12       | 22        | 0     | 0         | 0           | 0           | 0          | 0      | 0        | 17          | 0             | 0        | 0             | 0        | 0         | 0              | 0            | 0         |
| escena 4a  | 29     | 0       | 0        | 0         | 0     | 0         | 0           | 0           | 0          | 0      | 0        | 28          | 0             | 0        | 0             | 15       | 0         | 0              | 0            | 0         |
| escena 4b  | 1      | 0       | 0        | 0         | 0     | 0         | 0           | 0           | 0          | 0      | 0        | 1           | 0             | 0        | 0             | 3        | 0         | 0              | 0            | 0         |
| escena 4c  | 5      | 0       | 0        | 0         | 0     | 0         | 0           | 0           | 0          | 0      | 0        | 6           | 0             | 0        | 0             | 17       | 0         | 0              | 0            | 0         |
| escena 5a  | 0      | 4       | 0        | 0         | 0     | 0         | 0           | 0           | 0          | 0      | 0        | 0           | 0             | 0        | 0             | 0        | 0         | 0              | 0            | 6         |
| escena 5b  | 0      | 31      | 0        | 0         | 0     | 0         | 0           | 0           | 0          | 0      | 0        | 0           | 0             | 8        | 0             | 0        | 0         | 0              | 0            | 29        |
| escena 5c  | 0      | 0       | 0        | 0         | 0     | 0         | 0           | 0           | 0          | 0      | 0        | 0           | 0             | 23       | 0             | 0        | 0         | 0              | 0            | 0         |
| escena 6a  | 0      | 0       | 0        | 7         | 13    | 6         | 0           | 0           | 0          | 0      | 0        | 0           | 0             | 4        | 0             | 0        | 0         | 0              | 0            | 0         |
| escena 6b  | 0      | 0       | 0        | 3         | 3     | 4         | 0           | 0           | 0          | 0      | 0        | 0           | 0             | 0        | 0             | 0        | 0         | 0              | 0            | 0         |
| escena 6c  | 0      | 0       | 0        | 25        | 19    | 25        | 0           | 0           | 0          | 0      | 0        | 0           | 0             | 0        | 0             | 0        | 0         | 0              | 0            | 0         |
| escena 7a  | 0      | 0       | 0        | 0         | 0     | 0         | 0           | 0           | 0          | 0      | 17       | 0           | 0             | 0        | 0             | 0        | 0         | 0              | 0            | 0         |
| escena 7b  | 0      | 0       | 0        | 0         | 0     | 0         | 0           | 0           | 0          | 0      | 7        | 0           | 0             | 0        | 0             | 0        | 0         | 31             | 0            | 34        |
| escena 7c  | 0      | 0       | 0        | 0         | 0     | 0         | 0           | 0           | 0          | 0      | 11       | 0           | 0             | 0        | 0             | 0        | 0         | 4              | 0            | 1         |
| escena 8a  | 0      | 0       | 10       | 0         | 0     | 0         | 0           | 0           | 0          | 0      | 0        | 5           | 0             | 0        | 0             | 0        | 0         | 0              | 0            | 0         |
| escena 8b  | 0      | 0       | 6        | 0         | 0     | 0         | 0           | 0           | 0          | 0      | 0        | 8           | 0             | 7        | 0             | 0        | 0         | 0              | 0            | 0         |
| escena 8c  | 0      | 0       | 19       | 0         | 0     | 0         | 0           | 0           | 0          | 0      | 0        | 22          | 0             | 5        | 0             | 0        | 0         | 0              | 0            | 0         |
| escena 9a  | 0      | 0       | 0        | 28        | 0     | 0         | 0           | 0           | 26         | 0      | 0        | 0           | 0             | 23       | 0             | 0        | 0         | 0              | 0            | 30        |
| escena 9b  | 0      | 0       | 0        | 2         | 0     | 0         | 0           | 0           | 3          | 0      | 0        | 0           | 0             | 0        | 0             | 0        | 0         | 0              | 0            | 1         |
| escena 9c  | 0      | 0       | 0        | 5         | 0     | 0         | 0           | 0           | 6          | 0      | 0        | 0           | 0             | 0        | 0             | 0        | 0         | 0              | 0            | 4         |
| escena 10a | 0      | 0       | 5        | 0         | 0     | 0         | 0           | 0           | 0          | 0      | 0        | 0           | 0             | 0        | 0             | 0        | 0         | 0              | 0            | 0         |
| escena 10b | 0      | 0       | 18       | 0         | 0     | 0         | 0           | 0           | 0          | 0      | 0        | 0           | 0             | 3        | 4             | 0        | 0         | 0              | 0            | 0         |
| escena 10c | 0      | 0       | 12       | 0         | 0     | 0         | 0           | 0           | 0          | 0      | 0        | 0           | 0             | 21       | 21            | 0        | 0         | 0              | 0            | 0         |
| escena 11a | 9      | 0       | 0        | 0         | 0     | 0         | 0           | 0           | 0          | 0      | 0        | 8           | 0             | 11       | 10            | 0        | 0         | 0              | 0            | 0         |
| escena 11b | 6      | 0       | 0        | 0         | 0     | 0         | 0           | 0           | 0          | 0      | 0        | 4           | 0             | 0        | 6             | 0        | 0         | 0              | 0            | 0         |
| escena 11c | 20     | 0       | 0        | 0         | 0     | 0         | 0           | 0           | 0          | 0      | 0        | 23          | 0             | 0        | 6             | 0        | 0         | 0              | 0            | 0         |
| escena 12a | 0      | 0       | 2        | 1         | 0     | 0         | 0           | 0           | 1          | 0      | 0        | 0           | 0             | 0        | 23            | 0        | 0         | 0              | 0            | 0         |
| escena 12b | 0      | 0       | 20       | 27        | 0     | 0         | 0           | 0           | 29         | 0      | 0        | 0           | 0             | 0        | 0             | 0        | 0         | 0              | 0            | 0         |
| escena 12c | 0      | 0       | 13       | 7         | 0     | 0         | 0           | 0           | 5          | 0      | 0        | 0           | 0             | 0        | 0             | 0        | 0         | 0              | 0            | 0         |
| escena 13a | 0      | 0       | 0        | 0         | 20    | 0         | 8           | 0           | 0          | 0      | 0        | 29          | 0             | 0        | 0             | 0        | 0         | 0              | 0            | 0         |
| escena 13b | 0      | 0       | 0        | 0         | 4     | 0         | 19          | 0           | 0          | 0      | 0        | 2           | 0             | 0        | 0             | 0        | 0         | 0              | 0            | 0         |
| escena 13c | 0      | 0       | 0        | 0         | 11    | 0         | 8           | 0           | 0          | 0      | 0        | 4           | 0             | 0        | 0             | 0        | 0         | 0              | 0            | 0         |
| escena 14a | 0      | 0       | 0        | 25        | 0     | 0         | 0           | 0           | 0          | 20     | 0        | 0           | 0             | 0        | 0             | 0        | 0         | 0              | 0            | 28        |
| escena 14b | 0      | 0       | 0        | 10        | 0     | 0         | 0           | 0           | 0          | 11     | 0        | 0           | 0             | 0        | 0             | 0        | 0         | 0              | 0            | 7         |
| escena 14c | 0      | 0       | 0        | 0         | 0     | 0         | 0           | 0           | 0          | 4      | 0        | 0           | 0             | 0        | 0             | 0        | 0         | 0              | 0            | 0         |
| escena 15a | 0      | 0       | 8        | 0         | 0     | 0         | 0           | 0           | 0          | 0      | 0        | 6           | 0             | 0        | 0             | 0        | 0         | 0              | 0            | 0         |
| escena 15b | 0      | 0       | 5        | 0         | 0     | 0         | 0           | 0           | 0          | 0      | 0        | 2           | 0             | 8        | 0             | 0        | 0         | 0              | 0            | 0         |
| escena 15c | 0      | 0       | 22       | 0         | 0     | 0         | 0           | 0           | 0          | 0      | 0        | 27          | 0             | 3        | 0             | 0        | 0         | 0              | 0            | 0         |

## Alemania

| ATRIBUTOS  | angenehm | ansprechend | aufgehoben | Begeisterung | behaglich | entspannend | gefühl mir | gefühl mir n | harmoniert | In Kontakt tr | langweilig | reizlos | Sicherheit | spannend | stressig | Unruhe/ Ans |
|------------|----------|-------------|------------|--------------|-----------|-------------|------------|--------------|------------|---------------|------------|---------|------------|----------|----------|-------------|
| escena 1a  | 0        | 0           | 0          | 0            | 0         | 0           | 0          | 9            | 0          | 0             | 0          | 0       | 21         | 6        | 0        | 0           |
| escena 1b  | 0        | 0           | 0          | 0            | 0         | 0           | 0          | 8            | 0          | 0             | 0          | 0       | 17         | 23       | 0        | 0           |
| escena 1c  | 0        | 0           | 0          | 0            | 0         | 0           | 0          | 23           | 0          | 0             | 0          | 0       | 2          | 11       | 0        | 0           |
| escena 2a  | 0        | 0           | 31         | 0            | 30        | 0           | 0          | 0            | 29         | 0             | 0          | 0       | 0          | 0        | 0        | 0           |
| escena 2b  | 0        | 0           | 8          | 0            | 8         | 0           | 0          | 0            | 8          | 0             | 0          | 0       | 0          | 0        | 0        | 0           |
| escena 2c  | 0        | 0           | 1          | 0            | 2         | 0           | 0          | 0            | 3          | 0             | 0          | 0       | 0          | 0        | 0        | 0           |
| escena 3a  | 0        | 0           | 0          | 6            | 0         | 0           | 0          | 7            | 0          | 0             | 19         | 0       | 0          | 0        | 0        | 0           |
| escena 3b  | 0        | 0           | 0          | 1            | 0         | 0           | 0          | 24           | 0          | 0             | 15         | 0       | 0          | 0        | 0        | 0           |
| escena 3c  | 0        | 0           | 0          | 33           | 0         | 0           | 0          | 9            | 0          | 0             | 6          | 0       | 0          | 0        | 0        | 0           |
| escena 4a  | 27       | 0           | 0          | 0            | 25        | 0           | 0          | 0            | 26         | 0             | 0          | 0       | 0          | 0        | 0        | 0           |
| escena 4b  | 2        | 0           | 0          | 0            | 5         | 0           | 0          | 0            | 2          | 0             | 0          | 0       | 0          | 0        | 0        | 0           |
| escena 4c  | 11       | 0           | 0          | 0            | 10        | 0           | 0          | 0            | 12         | 0             | 0          | 0       | 0          | 0        | 0        | 0           |
| escena 5a  | 0        | 3           | 5          | 0            | 0         | 0           | 4          | 0            | 0          | 0             | 0          | 0       | 0          | 0        | 0        | 0           |
| escena 5b  | 0        | 37          | 35         | 0            | 0         | 0           | 36         | 0            | 0          | 0             | 0          | 0       | 0          | 0        | 0        | 0           |
| escena 5c  | 0        | 0           | 0          | 0            | 0         | 0           | 0          | 0            | 0          | 0             | 0          | 0       | 0          | 0        | 0        | 0           |
| escena 6a  | 0        | 0           | 0          | 0            | 11        | 0           | 10         | 0            | 0          | 0             | 0          | 0       | 6          | 0        | 0        | 0           |
| escena 6b  | 0        | 0           | 0          | 0            | 7         | 0           | 8          | 0            | 0          | 0             | 0          | 0       | 12         | 0        | 0        | 0           |
| escena 6c  | 0        | 0           | 0          | 0            | 22        | 0           | 22         | 0            | 0          | 0             | 0          | 0       | 22         | 0        | 0        | 0           |
| escena 7a  | 0        | 0           | 0          | 0            | 0         | 0           | 0          | 29           | 0          | 0             | 20         | 0       | 0          | 0        | 0        | 17          |
| escena 7b  | 0        | 0           | 0          | 0            | 0         | 0           | 0          | 6            | 0          | 0             | 4          | 0       | 0          | 0        | 0        | 13          |
| escena 7c  | 0        | 0           | 0          | 0            | 0         | 0           | 0          | 5            | 0          | 0             | 16         | 0       | 0          | 0        | 0        | 10          |
| escena 8a  | 0        | 7           | 0          | 0            | 0         | 0           | 0          | 0            | 0          | 7             | 0          | 0       | 0          | 14       | 0        | 0           |
| escena 8b  | 0        | 18          | 0          | 0            | 0         | 0           | 0          | 0            | 0          | 18            | 0          | 0       | 0          | 14       | 0        | 0           |
| escena 8c  | 0        | 15          | 0          | 0            | 0         | 0           | 0          | 0            | 0          | 15            | 0          | 0       | 0          | 12       | 0        | 0           |
| escena 9a  | 0        | 29          | 0          | 0            | 0         | 0           | 0          | 0            | 0          | 0             | 0          | 8       | 0          | 22       | 0        | 0           |
| escena 9b  | 0        | 2           | 0          | 0            | 0         | 0           | 0          | 0            | 0          | 0             | 0          | 20      | 0          | 3        | 0        | 0           |
| escena 9c  | 0        | 9           | 0          | 0            | 0         | 0           | 0          | 0            | 0          | 0             | 0          | 12      | 0          | 15       | 0        | 0           |
| escena 10a | 0        | 0           | 0          | 0            | 0         | 0           | 0          | 0            | 1          | 0             | 0          | 0       | 0          | 0        | 0        | 0           |
| escena 10b | 0        | 0           | 36         | 0            | 0         | 0           | 34         | 0            | 33         | 0             | 0          | 0       | 0          | 0        | 0        | 0           |
| escena 10c | 0        | 0           | 4          | 0            | 0         | 0           | 6          | 0            | 6          | 0             | 0          | 0       | 0          | 0        | 0        | 0           |
| escena 11a | 0        | 6           | 0          | 0            | 0         | 0           | 0          | 0            | 5          | 0             | 0          | 0       | 0          | 5        | 0        | 0           |
| escena 11b | 0        | 3           | 0          | 0            | 0         | 0           | 0          | 0            | 5          | 0             | 0          | 0       | 0          | 11       | 0        | 0           |
| escena 11c | 0        | 31          | 0          | 0            | 0         | 0           | 0          | 0            | 30         | 0             | 0          | 0       | 0          | 24       | 0        | 0           |
| escena 12a | 0        | 0           | 0          | 1            | 3         | 0           | 0          | 0            | 3          | 0             | 0          | 0       | 0          | 0        | 0        | 0           |
| escena 12b | 0        | 0           | 0          | 37           | 36        | 0           | 0          | 0            | 30         | 0             | 0          | 0       | 0          | 0        | 0        | 0           |
| escena 12c | 0        | 0           | 0          | 2            | 1         | 0           | 0          | 0            | 7          | 0             | 0          | 0       | 0          | 0        | 0        | 0           |
| escena 13a | 0        | 0           | 0          | 0            | 0         | 34          | 38         | 0            | 34         | 0             | 0          | 0       | 0          | 0        | 0        | 0           |
| escena 13b | 0        | 0           | 0          | 0            | 0         | 4           | 0          | 0            | 3          | 0             | 0          | 0       | 0          | 0        | 0        | 0           |
| escena 13c | 0        | 0           | 0          | 0            | 0         | 2           | 2          | 0            | 3          | 0             | 0          | 0       | 0          | 0        | 0        | 0           |
| escena 14a | 0        | 0           | 0          | 0            | 0         | 0           | 28         | 0            | 0          | 0             | 0          | 0       | 0          | 26       | 17       | 0           |
| escena 14b | 0        | 0           | 0          | 0            | 0         | 0           | 12         | 0            | 0          | 0             | 0          | 0       | 0          | 12       | 13       | 0           |
| escena 14c | 0        | 0           | 0          | 0            | 0         | 0           | 0          | 0            | 0          | 0             | 0          | 0       | 0          | 2        | 10       | 0           |
| escena 15a | 0        | 0           | 0          | 0            | 0         | 0           | 7          | 0            | 10         | 0             | 0          | 0       | 0          | 5        | 0        | 0           |
| escena 15b | 0        | 0           | 0          | 0            | 0         | 0           | 0          | 0            | 0          | 0             | 0          | 0       | 0          | 2        | 0        | 0           |
| escena 15c | 0        | 0           | 0          | 0            | 0         | 0           | 33         | 0            | 30         | 0             | 0          | 0       | 0          | 33       | 0        | 0           |

| Pearson's Chi-squared test | X2    | grados de libertad | pvalor    |
|----------------------------|-------|--------------------|-----------|
| España                     | 11522 | 817                | < 2.2e-16 |
| Peru                       | 13859 | 774                | < 2.2e-16 |
| Alemania                   | Nulo  | 645                | Nulo      |

| Observaciones                                                                                                                                                                         |
|---------------------------------------------------------------------------------------------------------------------------------------------------------------------------------------|
| Los resultados obtenidos con el test estadístico chi cuadrado pueden ser incorrectos porque no se cumple una de las premisas que es que los valores esperados deben ser mayores que 5 |

| Test de independencia, Test de Fischer | pvalor    |
|----------------------------------------|-----------|
| España                                 | 0.0004998 |
| Peru                                   | 0.0004998 |
| Alemania                               | 0.0004998 |

|                                                                                                                                       |
|---------------------------------------------------------------------------------------------------------------------------------------|
| Cuando esto ocurre se recomienda usar el test de fishcher que si acepta tamaños de muestra pequeños y valores esperados menores de 5. |
|---------------------------------------------------------------------------------------------------------------------------------------|

| Pearson's Chi-squared test with simulated p-value | X2    | grados de libertad | pvalor    |
|---------------------------------------------------|-------|--------------------|-----------|
| España                                            | 11522 | 817                | 0.0004998 |
| Peru                                              | 13859 | 774                | 0.0004998 |
| Alemania                                          | Nulo  | 645                | Nulo      |

|                                                                                                                                                                                           |
|-------------------------------------------------------------------------------------------------------------------------------------------------------------------------------------------|
| Aun cuando la muestra fuera pequeñas y los valores esperados menores de 5 se podría calcular el test de chi cuadrado aumentando el número de replicas o permutaciones hasta 2000 replicas |
|-------------------------------------------------------------------------------------------------------------------------------------------------------------------------------------------|

| Conclusion                                                                                                                                                           |
|----------------------------------------------------------------------------------------------------------------------------------------------------------------------|
| En todos los cálculos el pvalor es menor que 0.05 por tanto podemos concluir que existe una asociación entre las variables, es decir las variables son dependientes. |

```
a <- read.csv("Datos españa Juli.csv",sep=";")  
b <- read.csv("Datos peru Juli.csv",sep=";")  
c <- read.csv("Datos alemania Juli.csv",sep=";")
```

```
chisq.test(a)  
chisq.test(b)  
chisq.test(c)
```

```
fisher.test(a,simulate.p.value=TRUE, B=2e3)  
fisher.test(b,simulate.p.value=TRUE, B=2e3)  
fisher.test(c,simulate.p.value=TRUE, B=2e3)
```

```
chisq.test(a,simulate.p.value=T)  
chisq.test(b,simulate.p.value=T)  
chisq.test(c,simulate.p.value=T)
```
